# Supplementary material for: Synthesis of aminoacylated N6,N6-dimethyladenosine solid support for efficient access to hydrolysis-resistant 3′-charged tRNA mimics
Source: PubMed Central journal article supplement (PMC4270447; doi:10.1016/j.bmc.2014.09.054), 2014-12-15

## SUPPORTING INFORMATION TO

### Synthesis of aminoacylated $N^6, N^6$ -dimethyladenosine solid support for efficient access to hydrolysis-resistant 3'-charged tRNA mimics

Sandro Neuner and Ronald Micura\*

*Institute of Organic Chemistry and Center for Molecular Biosciences CMBI, University of Innsbruck, Innrain 80-82, 6020 Innsbruck, Austria*

---

## CONTENTS

### $^1\text{H}$ and $^{13}\text{C}$ NMR spectra of compounds 2 to 7, and 9

|             |     |
|-------------|-----|
| compound 2  | S2  |
| compound 3  | S3  |
| compound 4  | S4  |
| compound 4a | S5  |
| compound 5  | S6  |
| compound 5a | S7  |
| compound 6  | S8  |
| compound 7  | S9  |
| compound 9  | S10 |

## 9-(3'-Azido-3'-deoxy- $\beta$ -D-arabinofuranosyl)-6-(1,2,4-triazol-4-yl)purine (2)

$^1\text{H NMR}$  (300 MHz, DMSO- $d_6$ ) of compound **2**:

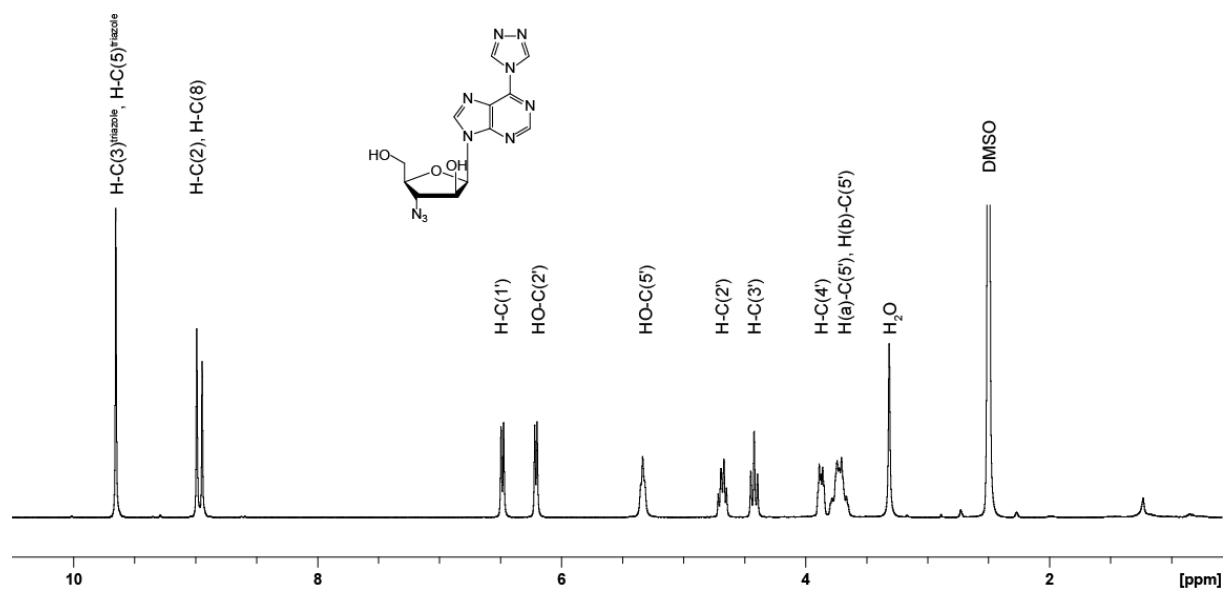

$^{13}\text{C NMR}$  (75 MHz, DMSO- $d_6$ ) of compound **2**:

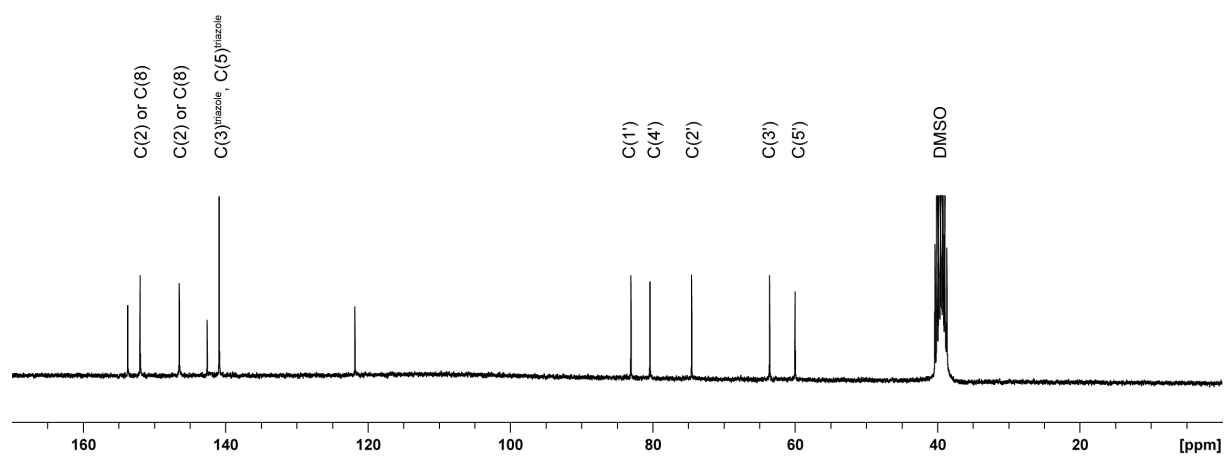

### 9-(3'-Azido-3'-deoxy- $\beta$ -D-arabinofuranosyl)-6-(dimethylamino)purine (**3**)

$^1\text{H NMR}$  (300 MHz, DMSO- $d_6$ ) of compound **3**:

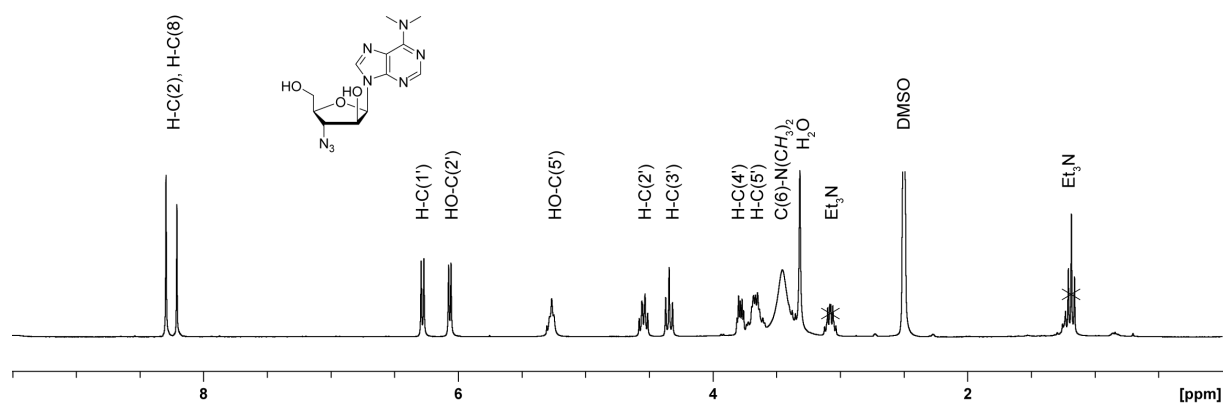

$^{13}\text{C NMR}$  (75 MHz, DMSO- $d_6$ ) of compound **3**:

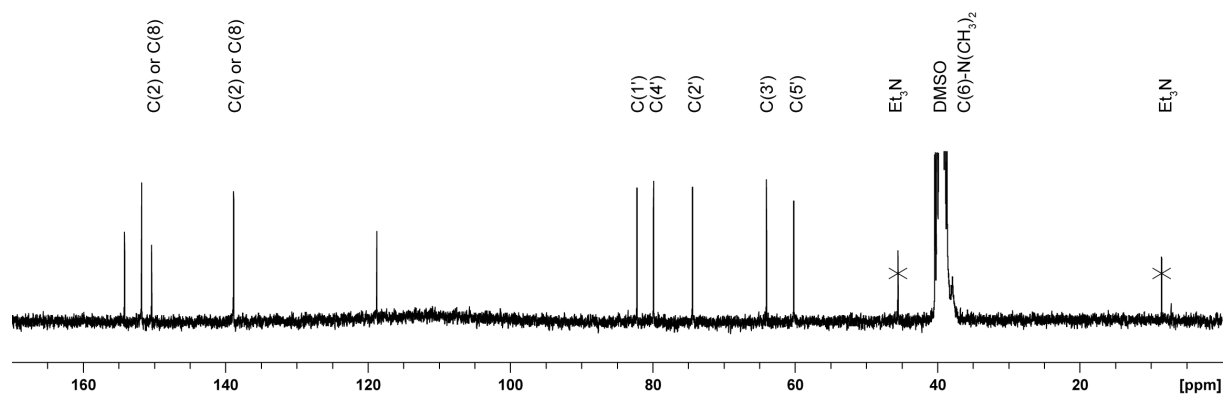

**9-[3'-Azido-3'-deoxy-5'-O-(4,4'-dimethoxytrityl)- $\beta$ -D-arabinofuranosyl]-6-(dimethylamino)purine (4)**

**$^1\text{H}$  NMR** (300 MHz, DMSO- $d_6$ ) of compound **4**:

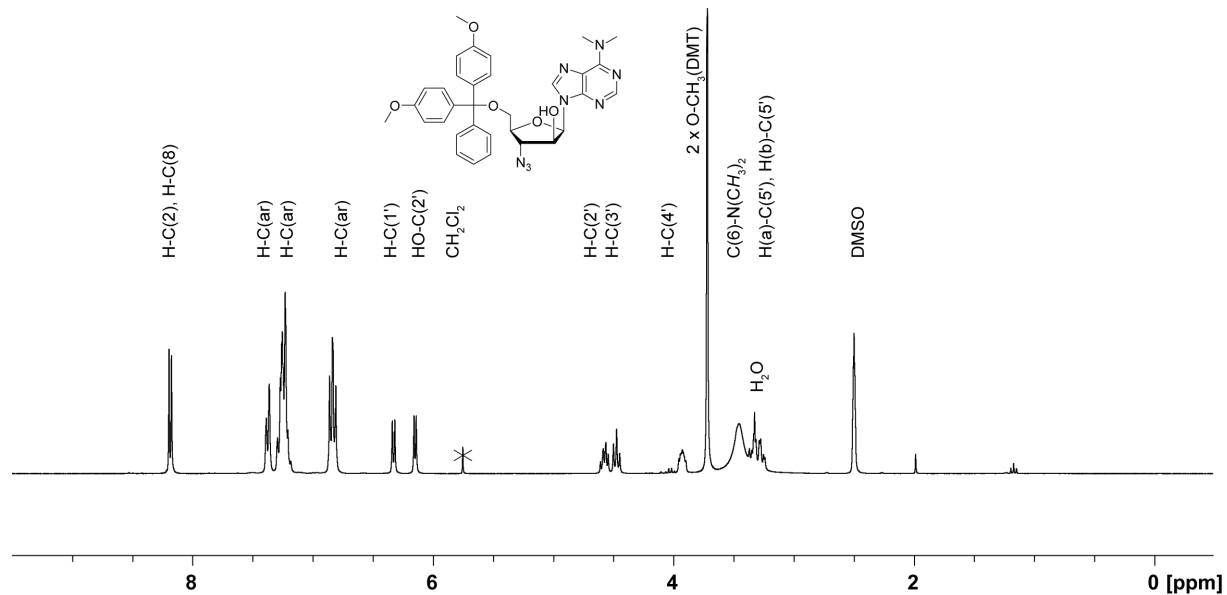

**$^{13}\text{C}$  NMR** (75 MHz, DMSO- $d_6$ ) of compound **4**:

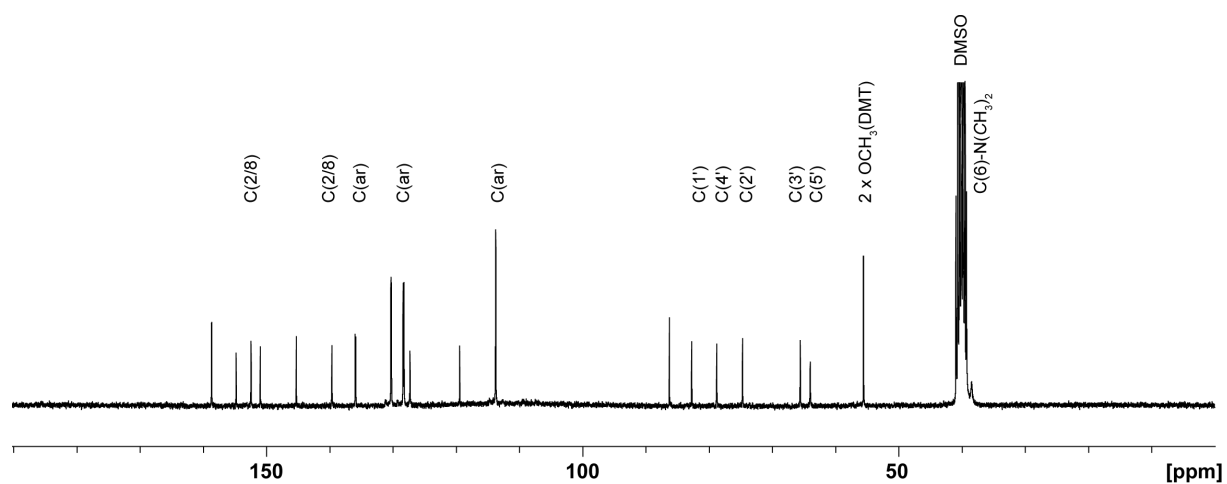

**9-[3'-Azido-3'-deoxy-2'-O-(trifluoromethanesulfonyl)-5'-O-(4,4'-dimethoxytrityl)- $\beta$ -D-arabinofuranosyl]-6-(dimethylamino)purine (4a)**

**$^1\text{H NMR}$**  (300 MHz, DMSO- $d_6$ ) of compound **4a**:

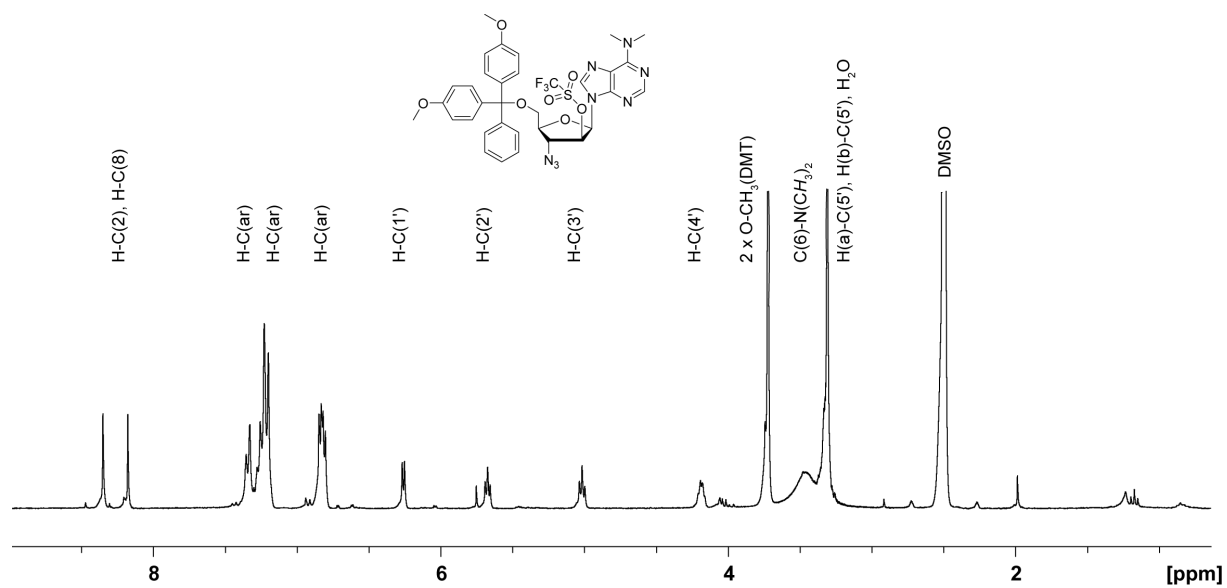

**3'-Azido-3'-deoxy-5'-O-(4,4'-dimethoxytrityl)-N<sup>6</sup>,N<sup>6</sup>-dimethyl-β-D-adenosine (5)**

**<sup>1</sup>H NMR** (300 MHz, DMSO-d<sub>6</sub>) of compound **5**:

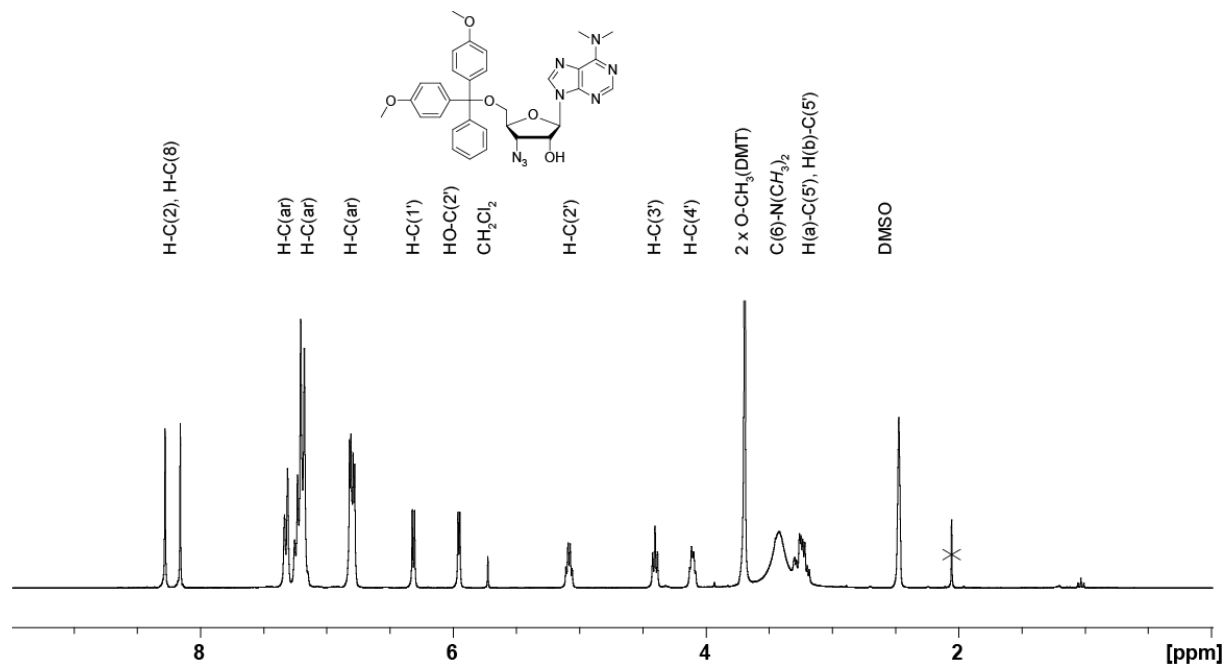

**<sup>13</sup>C NMR** (75 MHz, DMSO-d<sub>6</sub>) of compound **5**:

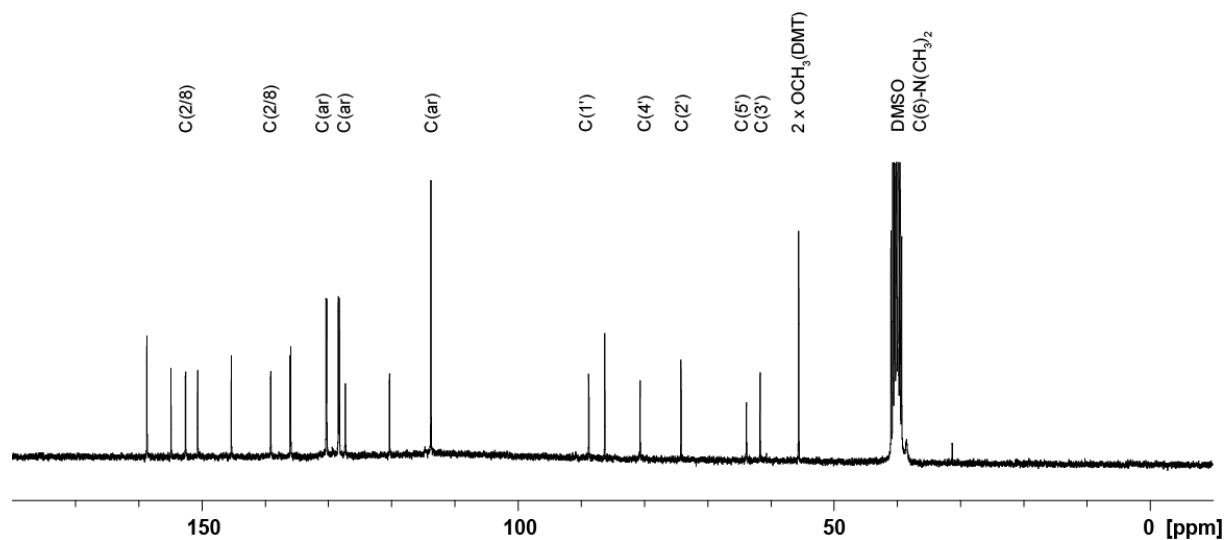

**3'-Amino-3'-deoxy-5'-O-(4,4'-dimethoxytrityl)-N<sup>6</sup>,N<sup>6</sup>-dimethyl-β-D-adenosine (5a)**

**<sup>1</sup>H NMR** (300 MHz, DMSO-d<sub>6</sub>) of compound **5a**:

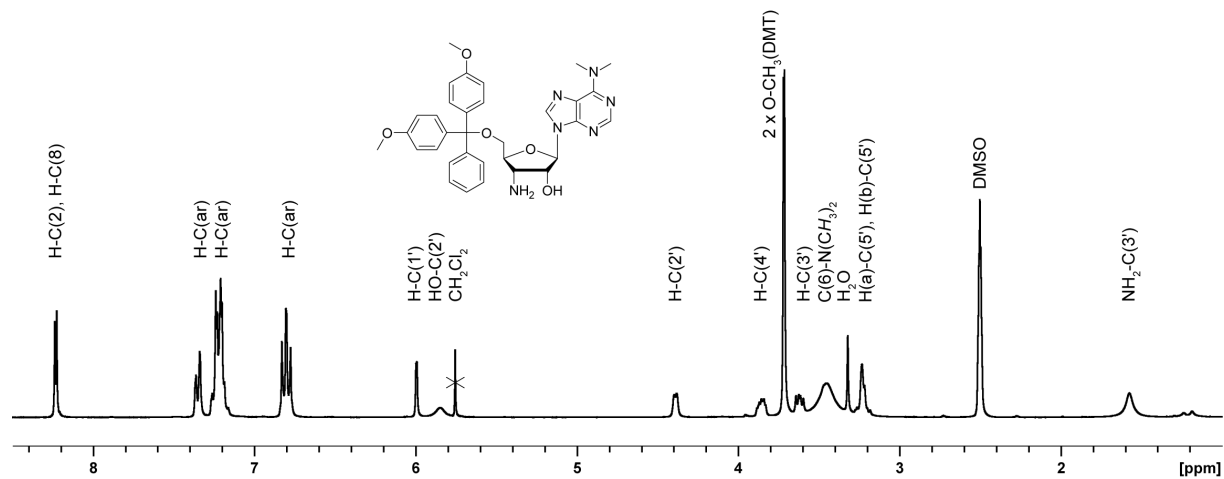

**<sup>13</sup>C NMR** (75 MHz, DMSO-d<sub>6</sub>) of compound **5a**:

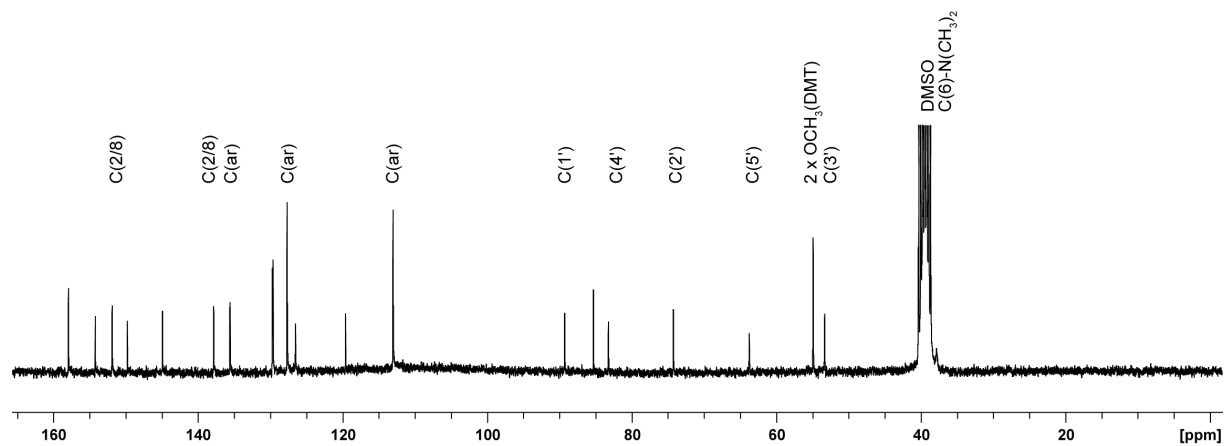

**3'-{[N-(9-fluorenyl)methoxycarbonyl-glycyl]amino}-3'-deoxy-5'-O-(4,4'-dimethoxytrityl)-N<sup>6</sup>,N<sup>6</sup>-dimethyl-β-D-adenosine (6)**

**<sup>1</sup>H NMR** (300 MHz, DMSO-d<sub>6</sub>) of compound **6**:

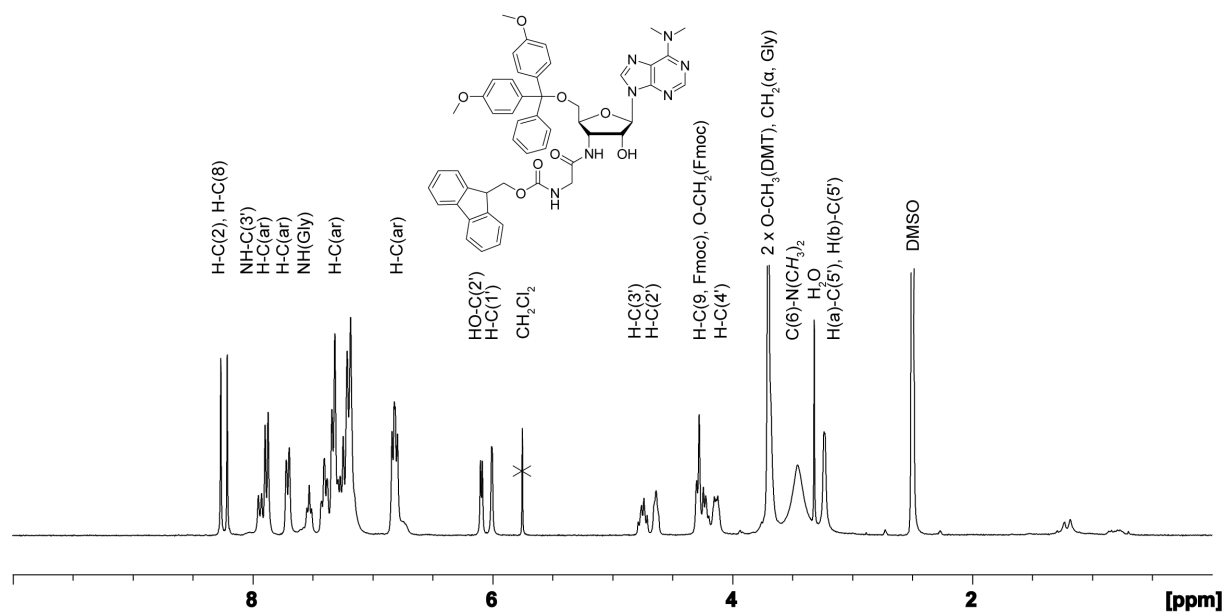

**<sup>13</sup>C NMR** (75 MHz, DMSO-d<sub>6</sub>) of compound **6**:

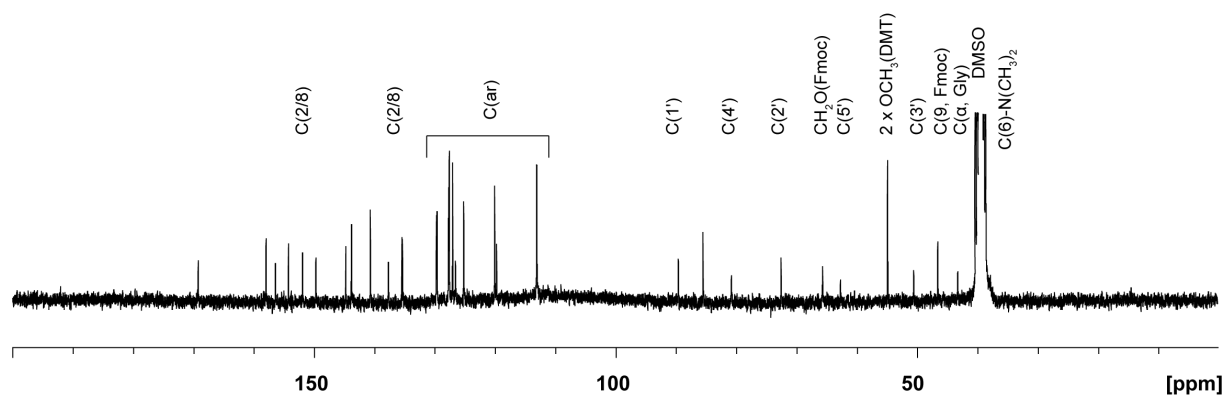



**3'-{[N-(9-fluorenyl)methoxycarbonyl-glycyl]amino}-3'-deoxy-5'-O-(4,4'-dimethoxytrityl)-N<sup>6</sup>,N<sup>6</sup>-dimethyl-2'-O-[1,6-dioxo-6-(pentafluorophenoxy)hexyl]-β-D-adenosine (7)**

**<sup>1</sup>H NMR (300 MHz, DMSO-d<sub>6</sub>) of compound 7:**

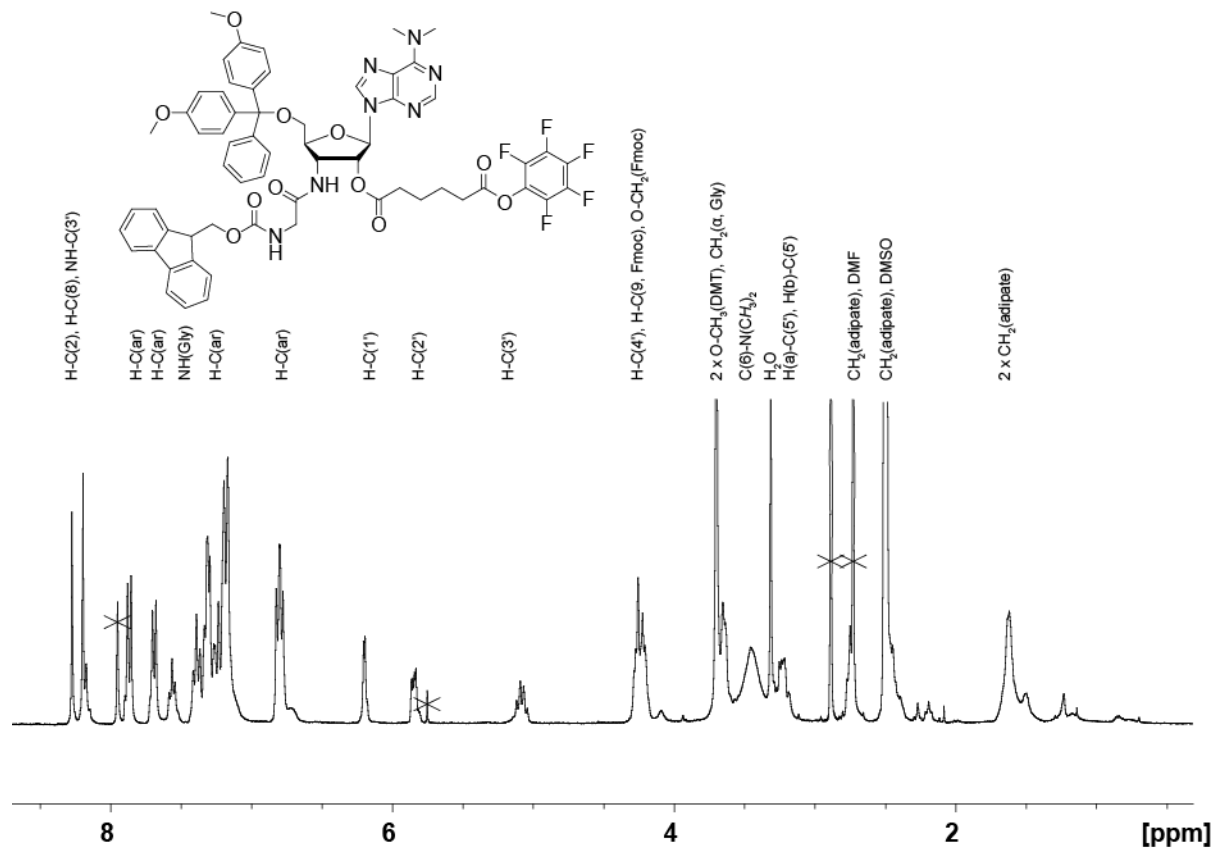

**3'-{[N-(9-fluorenyl)-methoxycarbonyl-N<sup>6</sup>,N<sup>6</sup>,N<sup>6</sup>-(trimethyl)-L-lysyl]amino}-3'-deoxy-5'-O-(4,4'-dimethoxytrityl)-N<sup>6</sup>,N<sup>6</sup>-dimethyl-β-D-adenosine (9)**

**<sup>1</sup>H NMR** (300 MHz, DMSO-d<sub>6</sub>) of compound **9**:

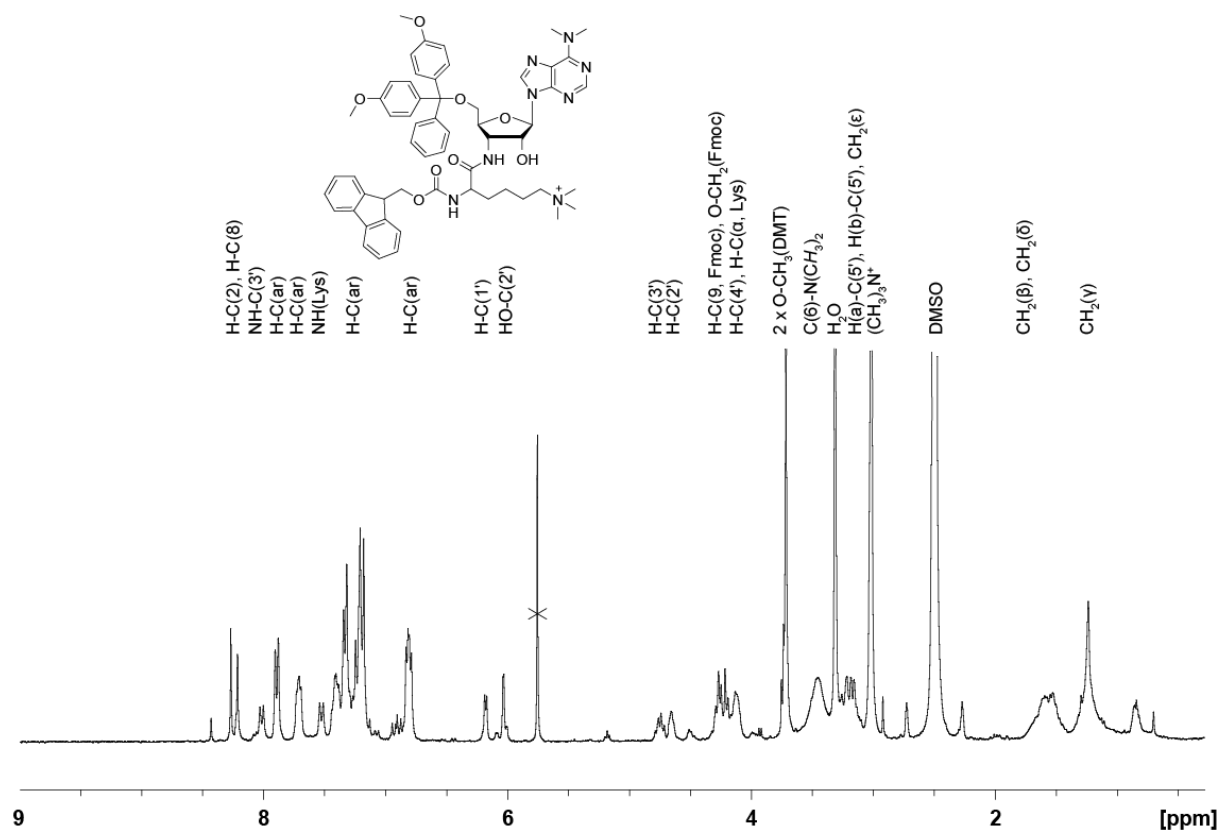

Supplement: mmc1.pdf [file mmc1.pdf]
